# Supplementary material for: AAV9 transduction mediated by systemic delivery of vector via retro-orbital injection in newborn, neonatal and juvenile mice
Source: PubMed Central journal article supplement — Exp Anim. 2021 May 25;70(4):450–8. doi: 10.1538/expanim.20-0186 (PMC8614020; doi:10.1538/expanim.20-0186), 2021-05-25
Supplement: expanim-70-450-s001.pdf [file expanim-70-450-s001.pdf]

## Supplementary figures

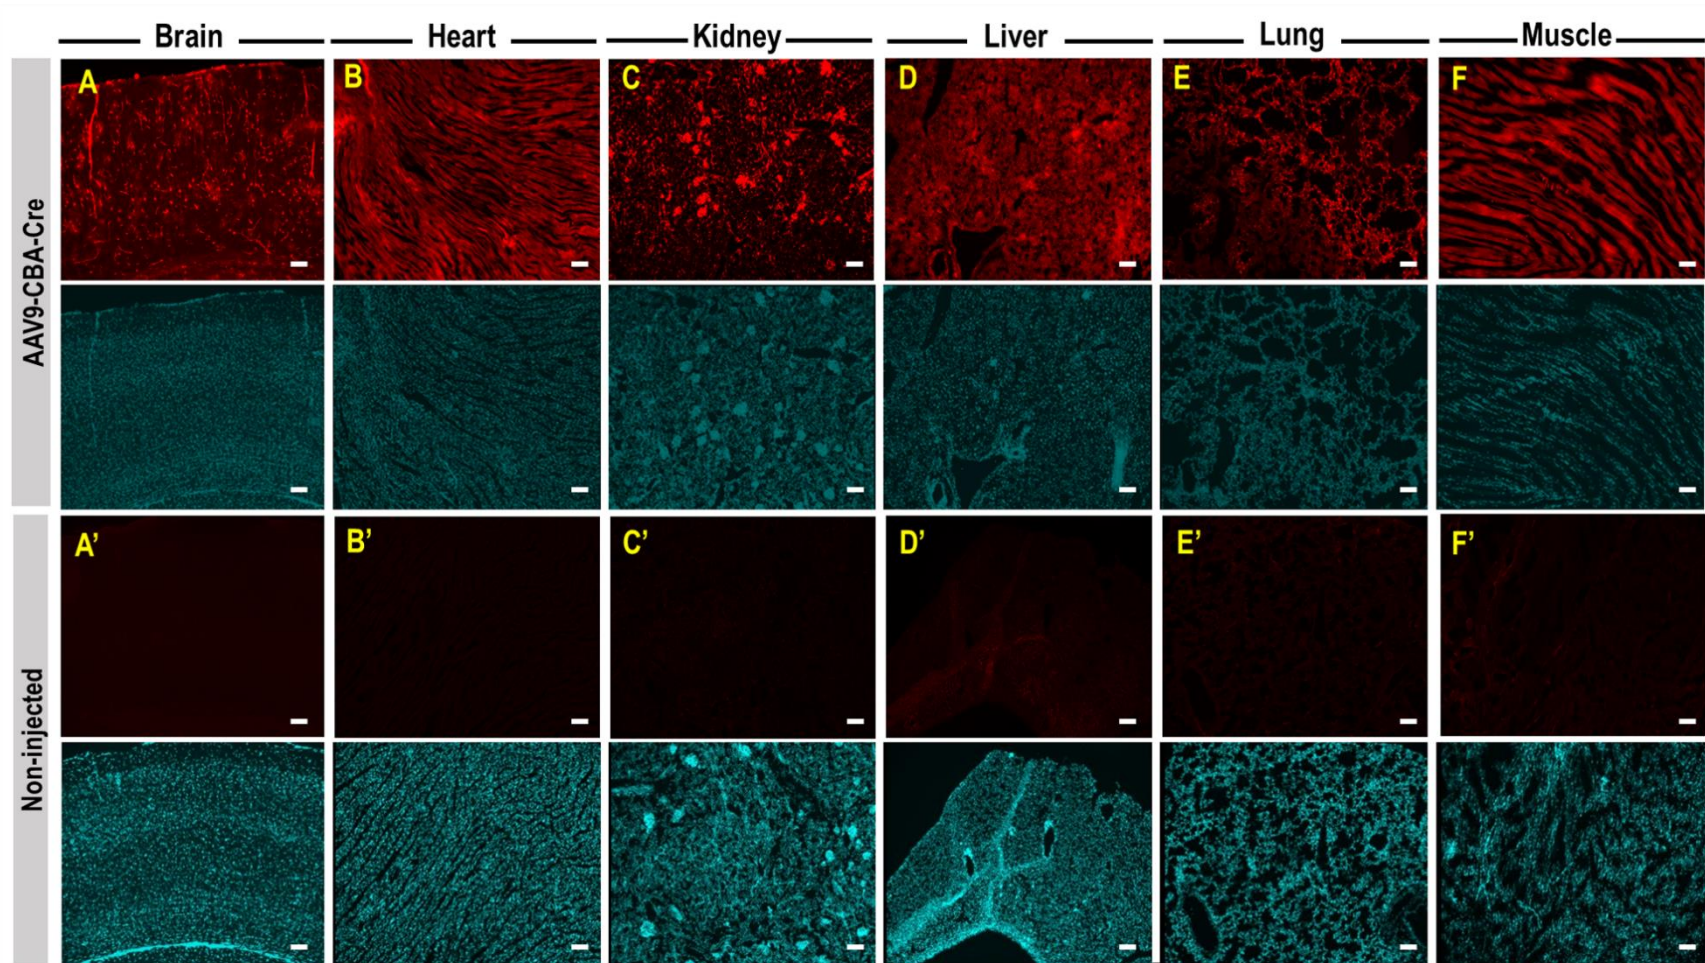

**Supplementary Figure 1.** Low magnification of the tdTomato expression (red) in central nervous system and peripheral organs following intravenous administration of AAV9-CBA-Cre via retro-orbital route of newborn pups detectable (A to F). For non-injected animals, low-to-no tdTomato expression is detectable (A' to F'). All tissue sections were counterstained with DAPI (cyan). Scale bars = 100  $\mu$ m.

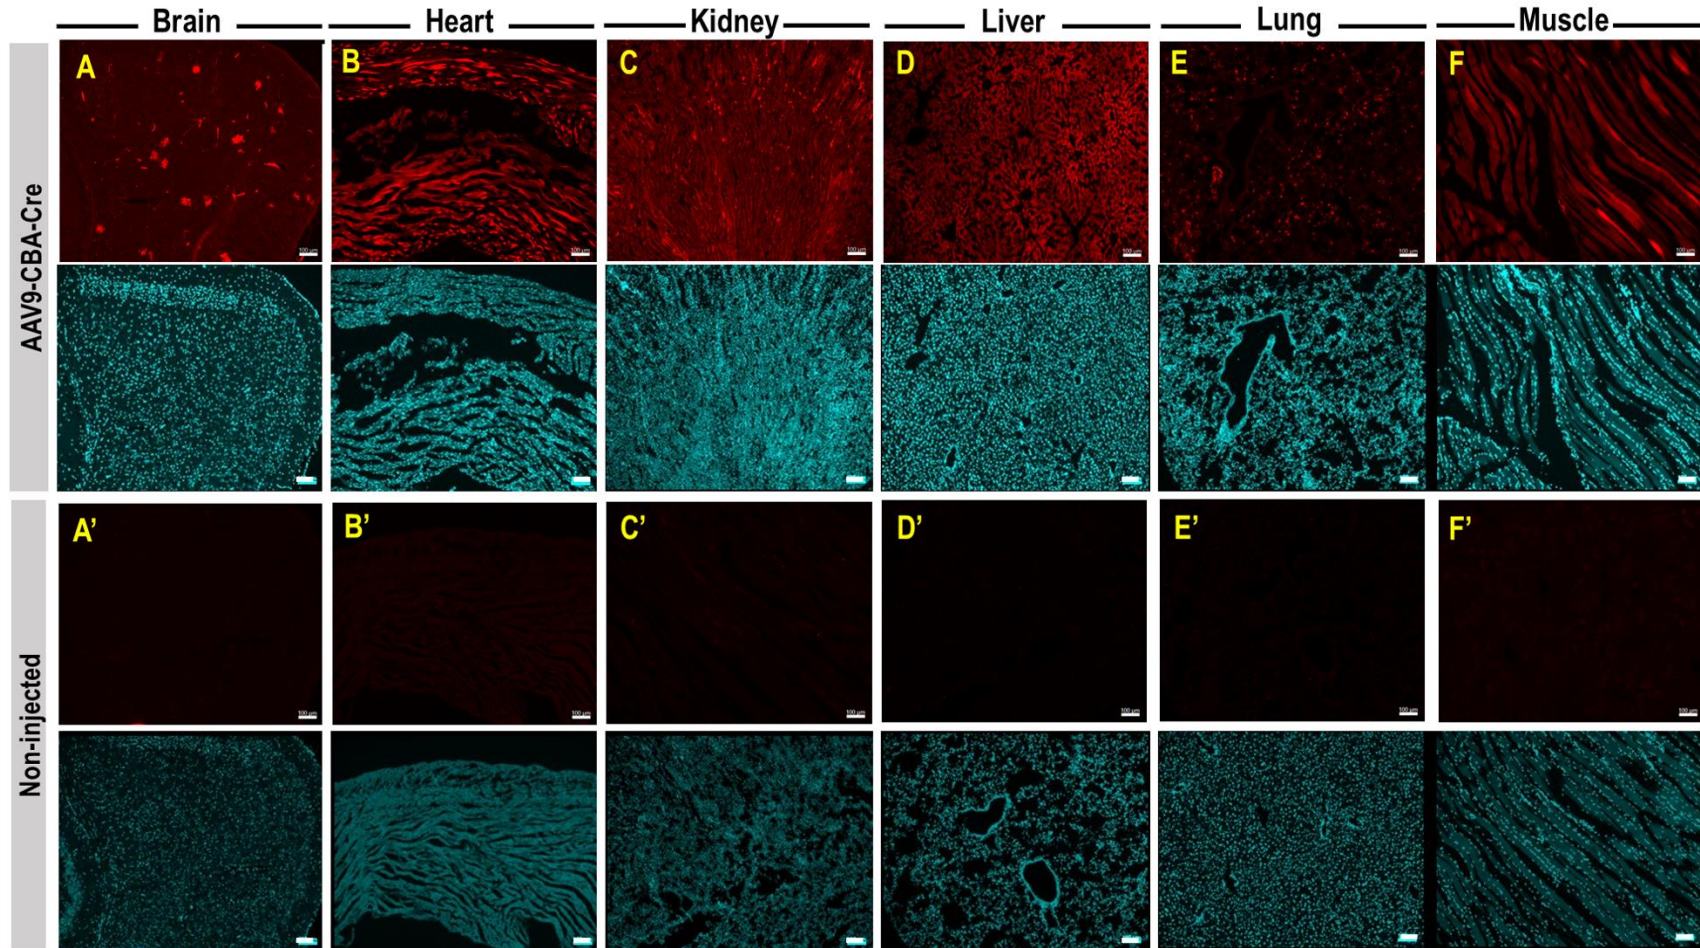

**Supplementary Figure 2.** Postnatal day 14 (P14) mouse pups were subjected to retro-orbital injection with AAV9-CBA-Cre at dosage of  $2.5 \times 10^{13}$  vg/kg. TdTomato immunofluorescence (red) is detectable in the low magnification of mouse brain cells (A), heart (B), kidney (C), liver (D), lung (E) and skeletal muscle (F). For non-injected animals, low-to-no tdTomato expression is detectable (A' to F'). All tissue sections were counterstained with DAPI (cyan). Scale bars = 100  $\mu$ m.

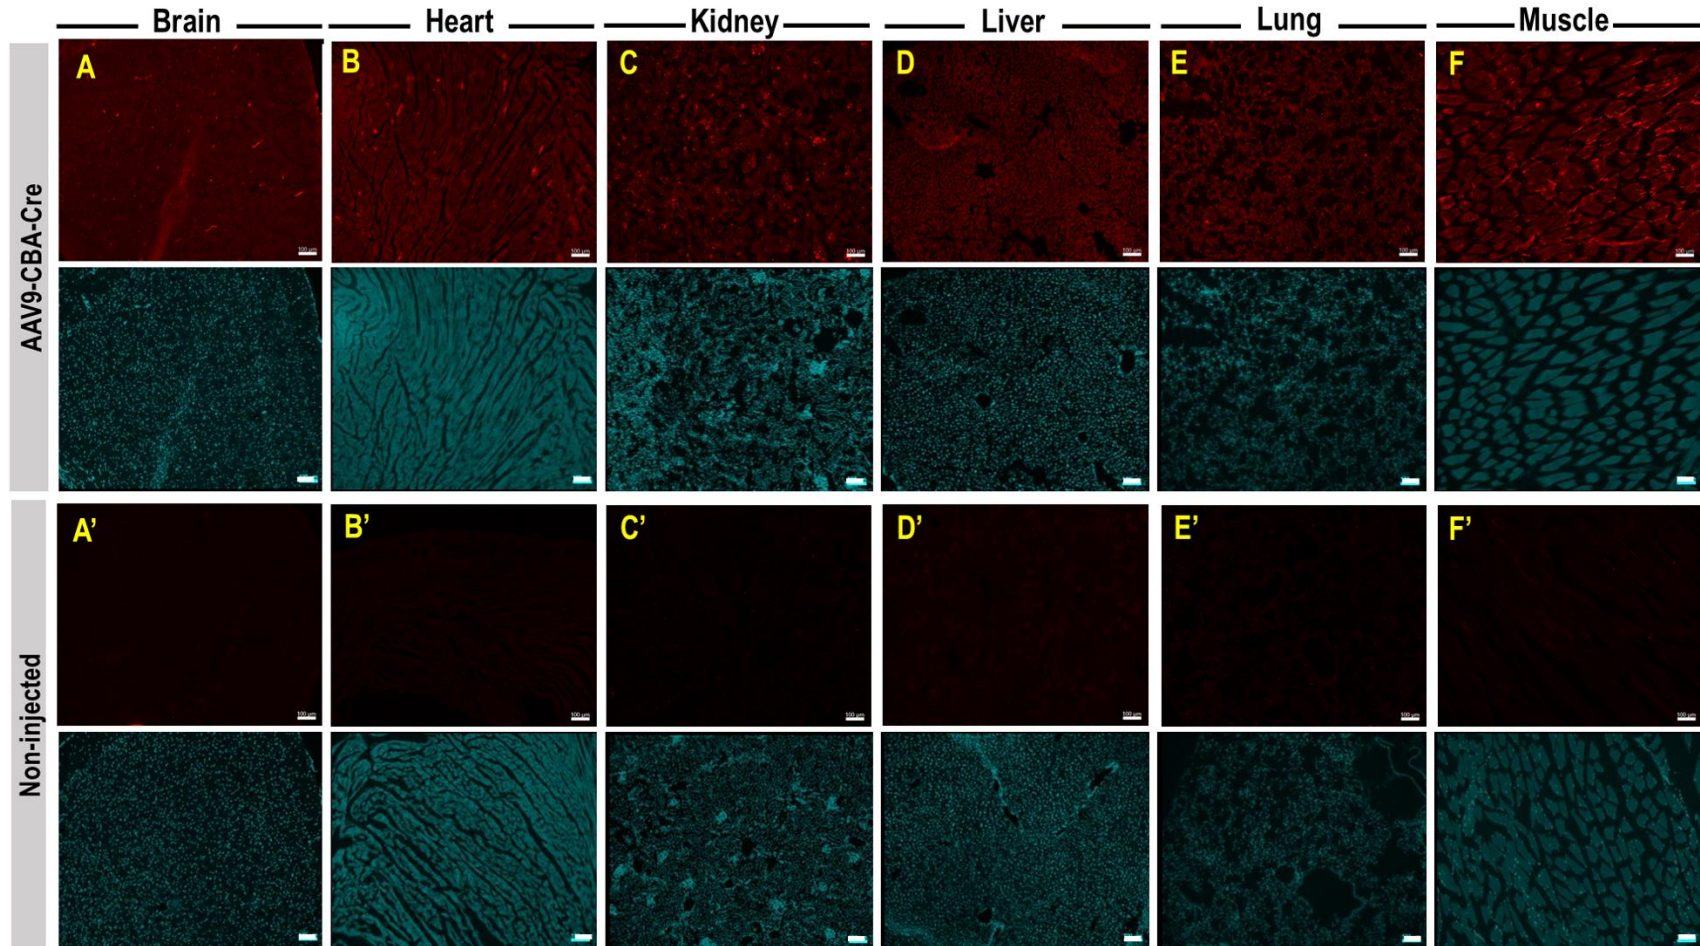

**Supplementary Figure 3.** Postnatal day 21 (P21) mice were retro-orbital injected with AAV9-CBA-Cre at dosage of  $1.5 \times 10^{13}$  vg/kg. Two weeks post-transduction (age P35), tdTomato immunofluorescence (red) is detectable in the low magnification of the central nervous system (A) and other peripheral organs (B-F). For non-injected animals of age-matched control littermates, low-to-no tdTomato expression is detectable (A' to F'). All tissue sections were counterstained with DAPI (cyan). Scale bars = 100  $\mu$ m
